# Supplementary material for: Pharmacokinetics and Tissue Distribution of Coumarins from Tagetes lucida in an LPS-Induced Neuroinflammation Model
Source: MDPI journal article supplement (doi:10.3390/plants11212805), 2022-10-22
Supplement: s1 [file s1]

**Table S1.** Stability test of PE, ES, DF, HR, and PU in plasma and tissues matrices.

| Nominal concentrations<br>( $\mu\text{g/mL}$ ) |          | 30.0        |         |           |         |             |         | 3.0         |         |           |         |             |         | 0.3         |         |           |         |             |         |
|------------------------------------------------|----------|-------------|---------|-----------|---------|-------------|---------|-------------|---------|-----------|---------|-------------|---------|-------------|---------|-----------|---------|-------------|---------|
| Matrix                                         | Analytes | Autosampler |         | Long-Term |         | Freeze-Thaw |         | Autosampler |         | Long-Term |         | Freeze-Thaw |         | Autosampler |         | Long-Term |         | Freeze-Thaw |         |
|                                                |          | RE (%)      | RSD (%) | RE (%)    | RSD (%) | RE (%)      | RSD (%) | RE (%)      | RSD (%) | RE (%)    | RSD (%) | RE (%)      | RSD (%) | RE (%)      | RSD (%) | RE (%)    | RSD (%) | RE (%)      | RSD (%) |
| Plasma                                         | PE       | 8.22        | 3.33    | -5.20     | 4.14    | -5.55       | 3.19    | 11.12       | 1.75    | -4.44     | 0.14    | -2.01       | 0.02    | -4.00       | 7.11    | -6.86     | 2.04    | 2.80        | 3.14    |
|                                                | SC       | 4.74        | 3.06    | -8.41     | 0.4     | -0.10       | 4.63    | 8.27        | 4.44    | -14.30    | 3.23    | 2.70        | 1.75    | 10.18       | 3.67    | -3.50     | 3.42    | -14.02      | 2.78    |
|                                                | DF       | 4.21        | 1.83    | -3.40     | 1.51    | 0.49        | 4.29    | -1.38       | 3.34    | -3.13     | 1.20    | 2.47        | 0.56    | 2.59        | 3.62    | -6.74     | 3.52    | -12.33      | 3.60    |
|                                                | HR       | 14.32       | 3.84    | 3.55      | 0.85    | -5.47       | 3.27    | 12.83       | 2.62    | 3.99      | 1.26    | -7.90       | 0.12    | 8.34        | 3.82    | 9.39      | 2.22    | 0.67        | 2.99    |
|                                                | PU       | -9.86       | 0.32    | -4.81     | 0.79    | -5.10       | 3.30    | -11.68      | 2.19    | -10.56    | 3.79    | -9.78       | 0.06    | -6.02       | 6.04    | -8.22     | 3.78    | -9.54       | 2.90    |
| Brain                                          | PE       | 4.05        | 2.41    | -3.82     | 7.36    | -1.25       | 1.84    | -0.34       | 0.42    | -3.44     | 2.93    | -2.34       | 0.81    | -2.37       | 2.25    | -0.63     | 2.20    | -1.15       | 2.22    |
|                                                | SC       | 4.78        | 0.82    | -4.75     | 5.16    | -2.00       | 2.06    | 0.37        | 0.55    | -0.94     | 3.18    | -3.09       | 1.05    | -2.15       | 6.74    | -0.19     | 7.54    | -1.98       | 3.52    |
|                                                | DF       | 3.21        | 1.84    | -4.35     | 4.84    | -0.35       | 2.71    | 3.73        | 4.47    | 0.46      | 7.28    | -6.72       | 6.02    | -4.07       | 3.93    | -0.62     | 4.73    | 0.03        | 6.75    |
|                                                | HR       | 3.86        | 4.66    | -4.72     | 7.56    | -1.02       | 2.32    | 2.31        | 3.40    | -0.98     | 4.02    | -5.14       | 2.86    | -3.47       | 2.28    | -0.21     | 4.32    | -0.69       | 3.43    |
|                                                | PU       | 4.57        | 1.36    | -4.61     | 4.89    | -1.74       | 3.57    | 1.80        | 6.54    | -5.42     | 7.69    | -4.49       | 1.81    | 2.13        | 7.31    | 3.45      | 5.33    | -6.54       | 1.62    |
| Kidney                                         | PE       | 1.61        | 4.83    | 7.34      | 2.86    | 1.12        | 0.67    | 3.99        | 3.25    | 2.69      | 2.61    | 0.91        | 1.11    | 7.06        | 3.54    | 3.02      | 4.06    | 2.26        | 1.48    |
|                                                | SC       | -0.35       | 3.02    | 4.36      | 0.96    | 0.49        | 1.25    | 5.72        | 4.22    | 2.63      | 4.94    | 1.51        | 1.10    | 7.01        | 2.06    | 3.92      | 2.74    | 2.62        | 1.16    |
|                                                | DF       | 0.66        | 2.66    | 5.67      | 1.09    | 0.47        | 2.83    | 4.79        | 3.43    | 8.12      | 6.10    | 0.82        | 2.74    | 5.83        | 0.91    | 5.19      | 0.61    | -0.65       | 4.96    |
|                                                | HR       | 1.35        | 3.92    | 3.32      | 3.31    | 2.25        | 0.33    | 2.81        | 4.89    | 3.06      | 2.88    | -0.62       | 2.98    | 8.17        | 0.69    | 5.12      | 4.41    | 2.03        | 0.52    |
|                                                | PU       | 1.66        | 5.07    | 6.46      | 2.54    | -1.02       | 1.16    | 5.21        | 2.66    | 8.68      | 4.53    | 2.01        | 7.60    | 7.10        | 3.77    | 5.54      | 2.78    | 3.61        | 6.04    |
| Spleen                                         | PE       | -1.02       | 3.87    | 2.78      | 1.68    | 2.38        | 1.95    | -10.42      | 4.70    | 3.67      | 5.55    | 4.42        | 9.54    | -5.98       | 4.42    | 1.51      | 14.11   | 2.50        | 9.85    |
|                                                | SC       | -0.99       | 1.97    | -2.12     | 9.82    | -4.22       | 1.60    | -6.71       | 2.83    | 2.22      | 9.10    | -2.65       | 5.26    | -7.70       | 5.57    | -9.67     | 2.35    | -9.57       | 5.92    |
|                                                | DF       | 1.50        | 6.07    | 7.60      | 7.81    | -1.06       | 3.27    | -1.66       | 9.62    | 7.09      | 4.06    | 0.49        | 2.05    | 6.88        | 8.79    | 5.43      | 6.32    | -0.67       | 7.82    |
|                                                | HR       | 1.18        | 4.27    | 2.92      | 3.61    | 0.49        | 2.02    | -0.16       | 11.83   | 7.44      | 2.80    | 4.87        | 3.30    | 5.46        | 6.29    | 0.22      | 5.85    | -0.63       | 3.77    |
|                                                | PU       | -2.63       | 5.87    | 4.26      | 1.51    | 2.27        | 5.02    | -4.98       | 5.34    | 7.56      | 4.95    | 2.88        | 4.42    | -0.09       | 1.99    | -6.92     | 3.30    | -8.53       | 6.45    |

PE = 7-O-prenylscopoletin, SC = scoparone, DF = dimethylfraxetin, HR = herniarin, and PU = 7-O-prenylumbelliferone

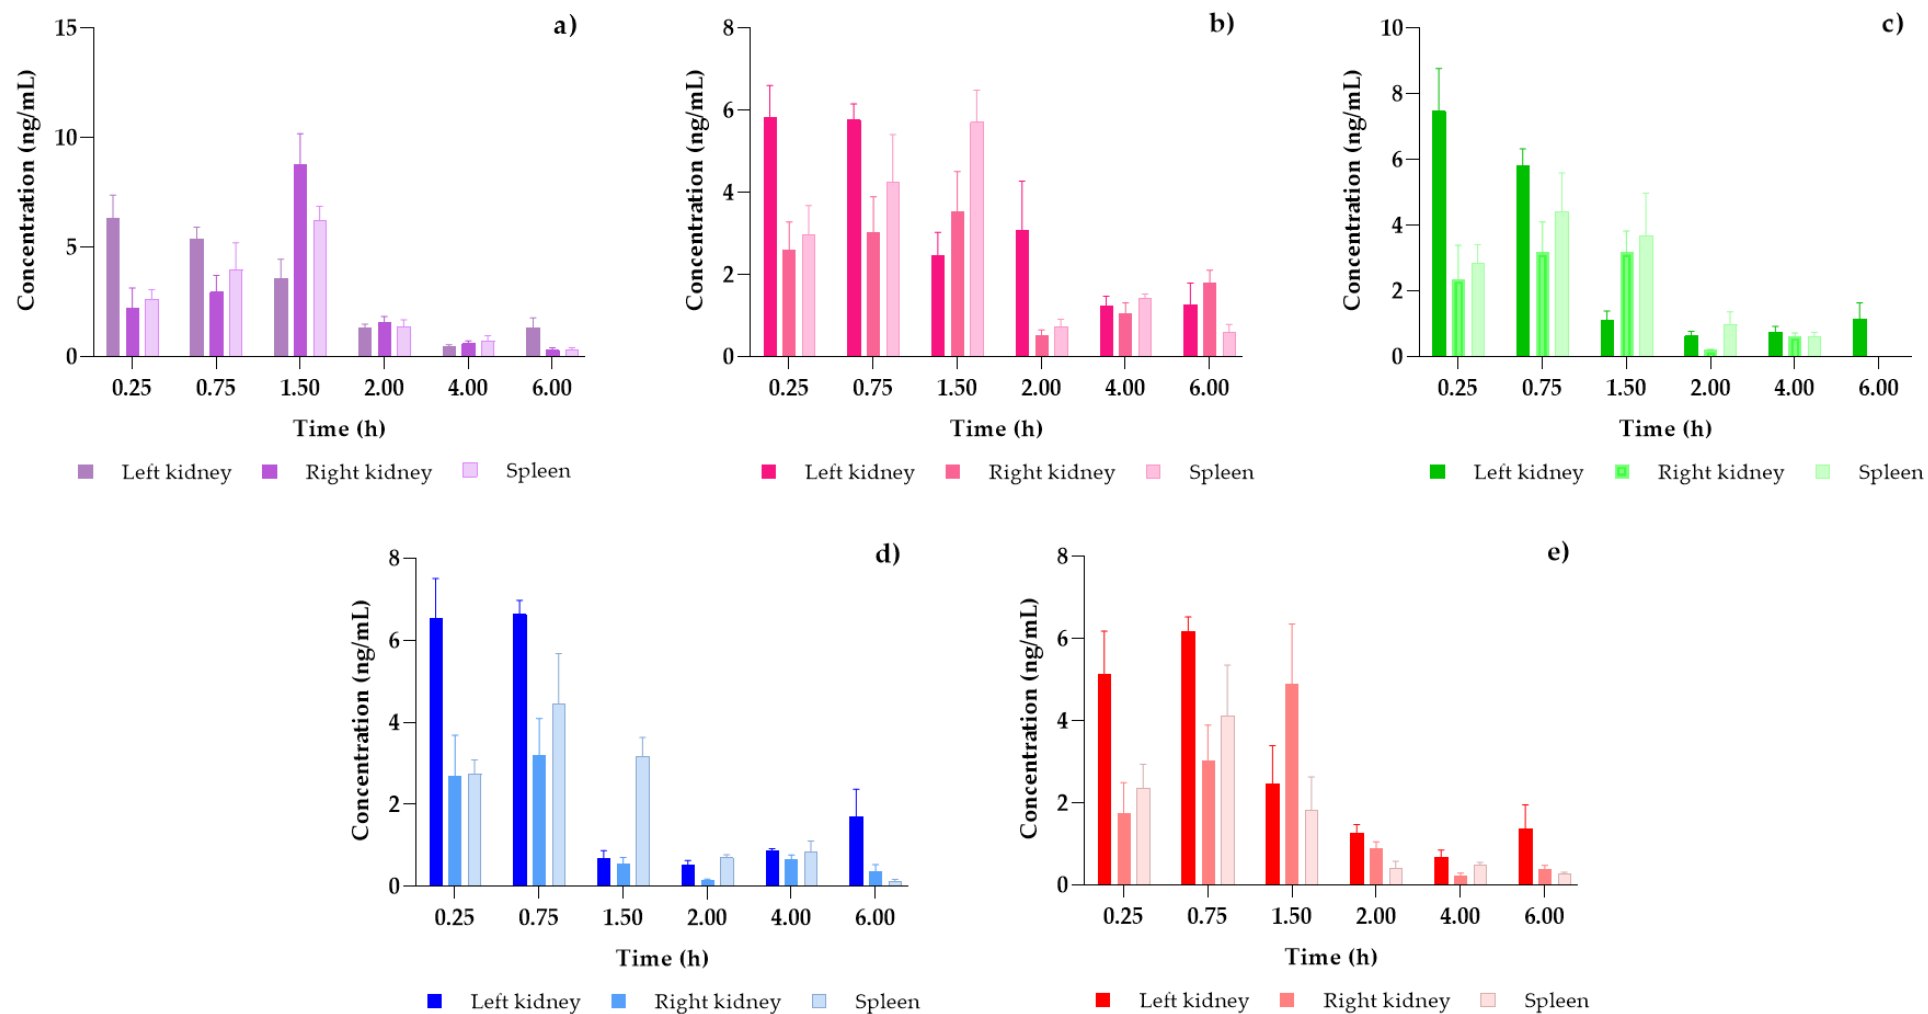

**Figure S1.** Tissue distribution in kidneys and spleen of 7-O-prenylscopoletin (PE), scoparone (SC), dimethylfraxetin (DF), herniarin (HR), 7-O-prenylumbelliferone (PU) after an oral dose administration of hexanic extract of *Tagetes lucida*. Values are presented as mean  $\pm$  SEM (n = 5).
